# Supplementary material for: International Expert Panel Consensus on Fat Grafting of the Breast
Source: PubMed Central journal article supplement — Plast Reconstr Surg Glob Open. 2019 Oct 28;7(10):e2426. doi: 10.1097/GOX.0000000000002426 (PMC6846285; doi:10.1097/gox.0000000000002426), 2019-10-28

- 2-3 mm cannulas
- > 3 mm cannulas
- power-assisted
- low-pressure pump-assisted
- manual aspiration with 10-50 ml syringe
- No Answer

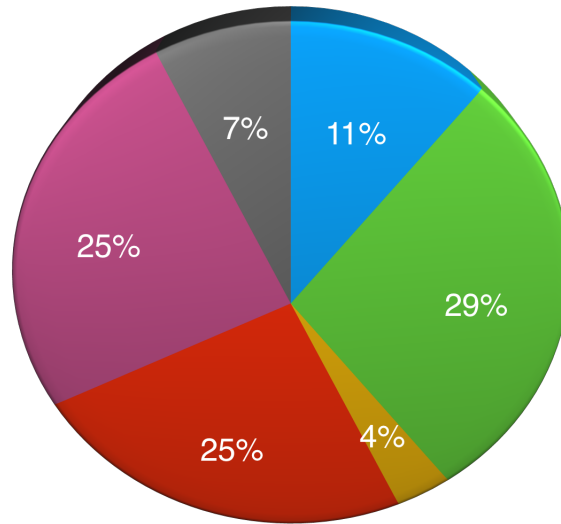

Supplement: gox-7-e2426-s003.pdf [file gox-7-e2426-s003.pdf]
