# Supplementary material for: International Expert Panel Consensus on Fat Grafting of the Breast
Source: PubMed Central journal article supplement — Plast Reconstr Surg Glob Open. 2019 Oct 28;7(10):e2426. doi: 10.1097/GOX.0000000000002426 (PMC6846285; doi:10.1097/gox.0000000000002426), 2019-10-28

- 1-2 mm Coleman cannulas and 10 cc syringes
- 12/14 G needles and 10 cc syringes
- 19/23 G needles and 1-3 cc syringes
- No Answer

- 1-2 mm Coleman cannulas and 1-3 cc syringes
- 12/14 G needles and 1-3 cc syringes
- Assisted fat delivery (Celbrush, etc.)

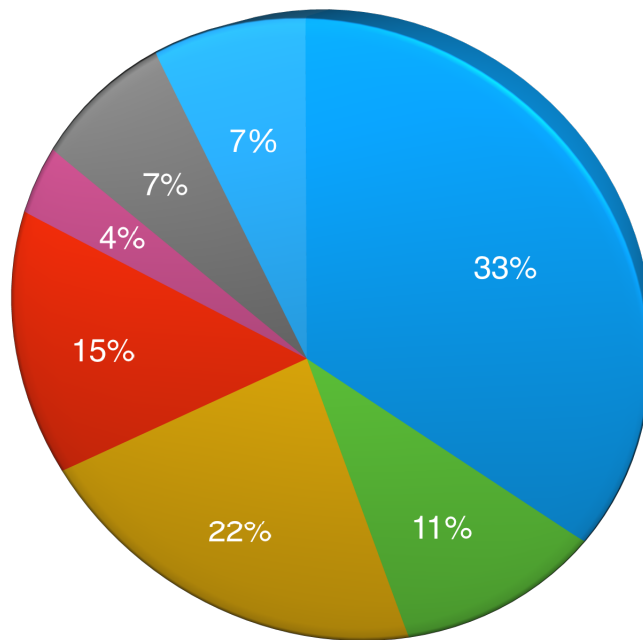

Supplement: gox-7-e2426-s007.pdf [file gox-7-e2426-s007.pdf]
