# Supplementary material for: International Expert Panel Consensus on Fat Grafting of the Breast
Source: PubMed Central journal article supplement — Plast Reconstr Surg Glob Open. 2019 Oct 28;7(10):e2426. doi: 10.1097/GOX.0000000000002426 (PMC6846285; doi:10.1097/gox.0000000000002426), 2019-10-28

- Fat intake/survival
- Fat necrosis in recipient site
- Aesthetic outcome of the donor site
- Patient satisfaction levels and quality of life
- Regenerative effects on damaged tissues
- Aesthetic outcome of the recipient site (shape/volume/symmetry)
- Stability of the results

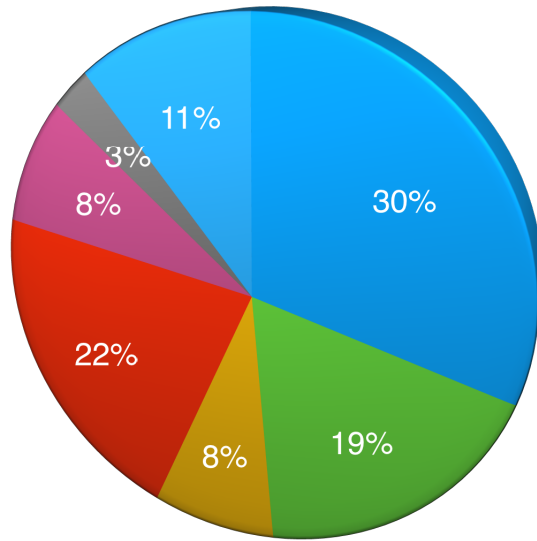

Supplement: gox-7-e2426-s010.pdf [file gox-7-e2426-s010.pdf]
