# Supplementary material for: International Expert Panel Consensus on Fat Grafting of the Breast
Source: PubMed Central journal article supplement — Plast Reconstr Surg Glob Open. 2019 Oct 28;7(10):e2426. doi: 10.1097/GOX.0000000000002426 (PMC6846285; doi:10.1097/gox.0000000000002426), 2019-10-28

- Pre-op/post-op standard pictures
- Pre-op/post-op MRI
- LENT-SOMA scale (for radiation damage)
- Clinical assessment
- Pre-op/post-op 3D pictures
- Non-validated questionnaires for patient satisfaction

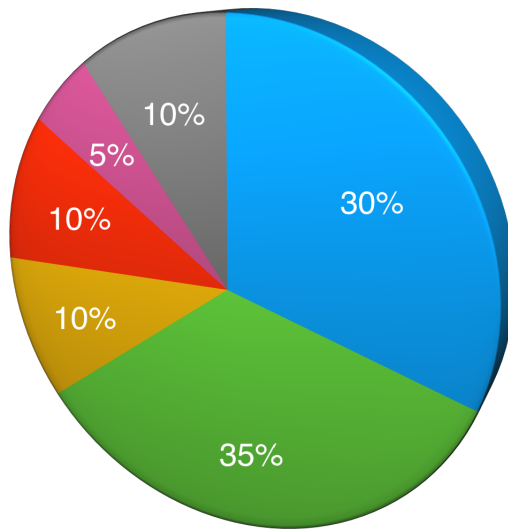

Supplement: gox-7-e2426-s011.pdf [file gox-7-e2426-s011.pdf]
