# Supplementary material for: International Expert Panel Consensus on Fat Grafting of the Breast
Source: PubMed Central journal article supplement — Plast Reconstr Surg Glob Open. 2019 Oct 28;7(10):e2426. doi: 10.1097/GOX.0000000000002426 (PMC6846285; doi:10.1097/gox.0000000000002426), 2019-10-28

- Yes
- No
- Not completely, depending on patients' characteristics/comorbidities, adjuvant therapies and fat grafting technique

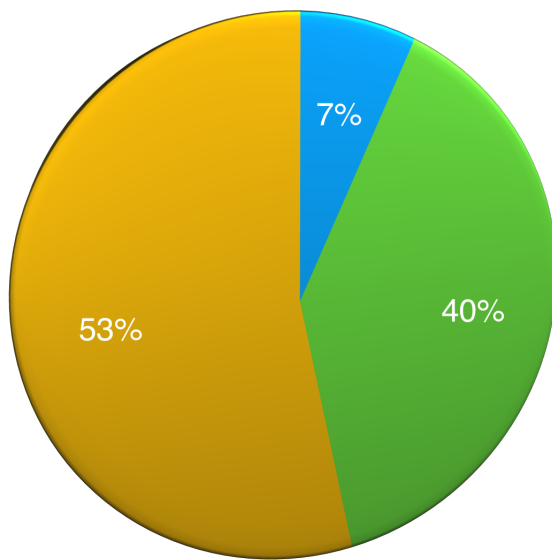

Supplement: gox-7-e2426-s012.pdf [file gox-7-e2426-s012.pdf]
