# Supplementary material for: International Expert Panel Consensus on Fat Grafting of the Breast
Source: PubMed Central journal article supplement — Plast Reconstr Surg Glob Open. 2019 Oct 28;7(10):e2426. doi: 10.1097/GOX.0000000000002426 (PMC6846285; doi:10.1097/gox.0000000000002426), 2019-10-28

- Yes, with standard surveillance
- Yes, with strict surveillance
- Yes, if not at the same time of mastectomy
- No

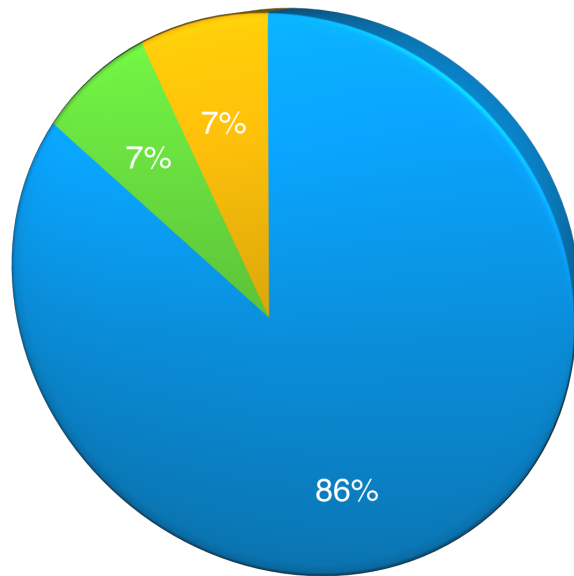

Supplement: gox-7-e2426-s014.pdf [file gox-7-e2426-s014.pdf]
