# Supplementary material for: International Expert Panel Consensus on Fat Grafting of the Breast
Source: PubMed Central journal article supplement — Plast Reconstr Surg Glob Open. 2019 Oct 28;7(10):e2426. doi: 10.1097/GOX.0000000000002426 (PMC6846285; doi:10.1097/gox.0000000000002426), 2019-10-28

- Safe, no significant impact if proper technique and surveillance granted by dedicated breast imaging specialist
- Safe, but patient well informed about the possibility of more second level exams
- Unsafe
- Absolutely safe

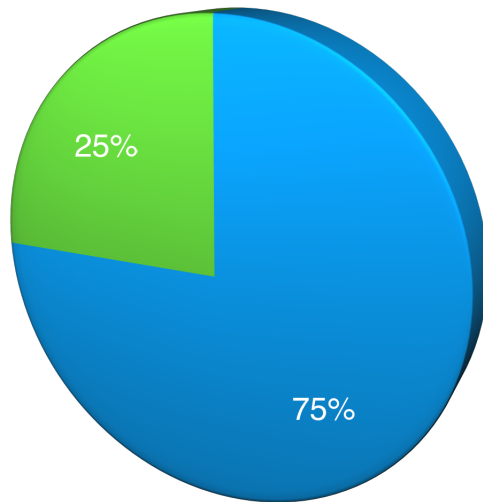

Supplement: gox-7-e2426-s017.pdf [file gox-7-e2426-s017.pdf]
