# Supplementary figures and images for: International Expert Panel Consensus on Fat Grafting of the Breast
Source: PubMed Central journal article supplement — Plast Reconstr Surg Glob Open. 2019 Oct 28;7(10):e2426. doi: 10.1097/GOX.0000000000002426 (PMC6846285; doi:10.1097/gox.0000000000002426), 2019-10-28

- Fat availability
- Patient's preference
- Closer site to the receiving area
- No Answer

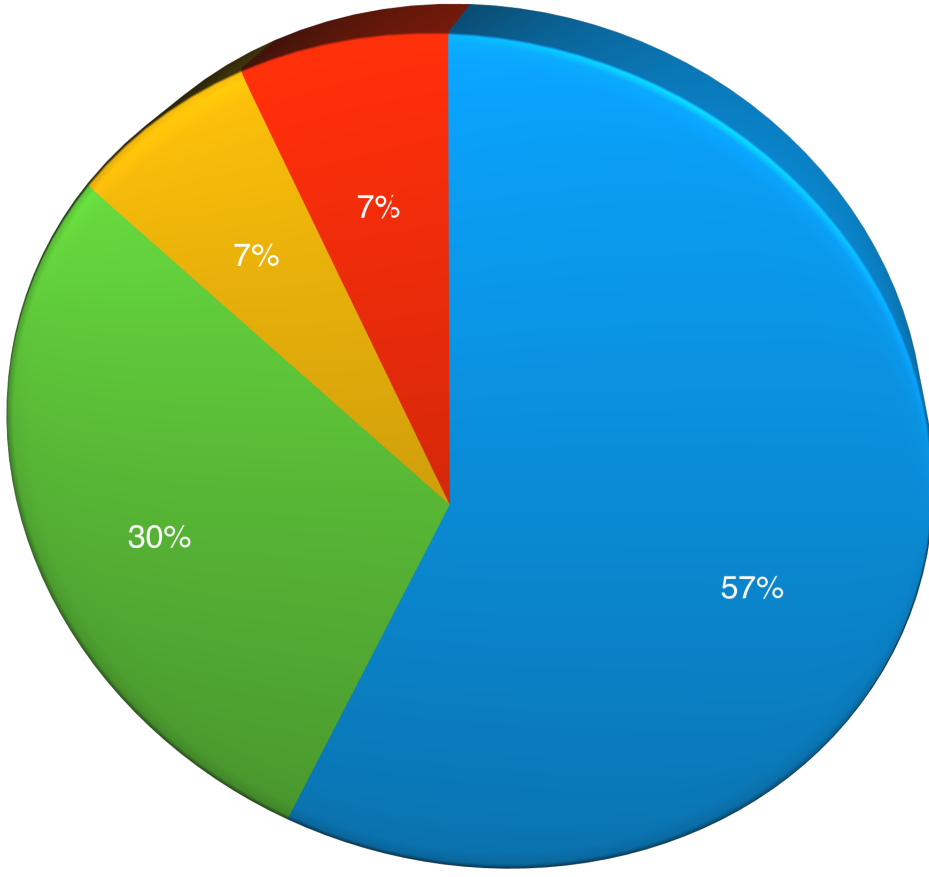

Supplement: gox-7-e2426-s002.pdf [file gox-7-e2426-s002.pdf]

● Yes

● No

● No Answer

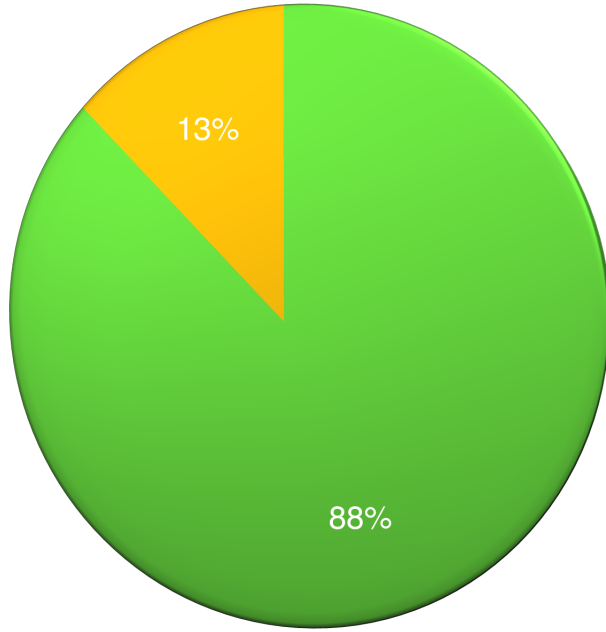

Supplement: gox-7-e2426-s005.pdf [file gox-7-e2426-s005.pdf]

● Yes

● No

● No Answer

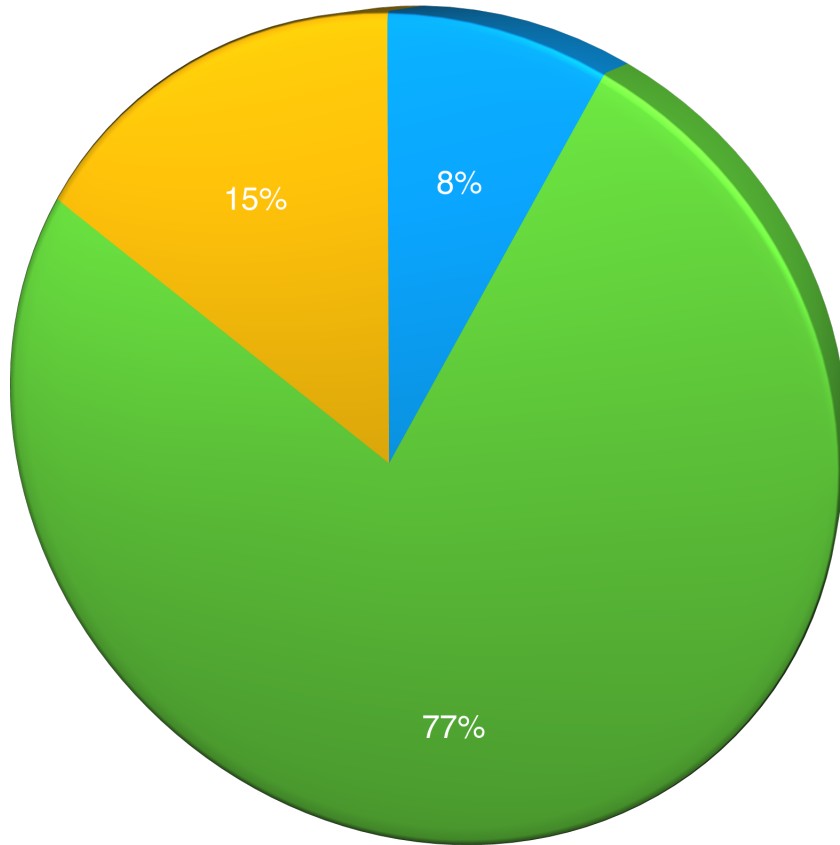

Supplement: gox-7-e2426-s006.pdf [file gox-7-e2426-s006.pdf]

● Yes

● No

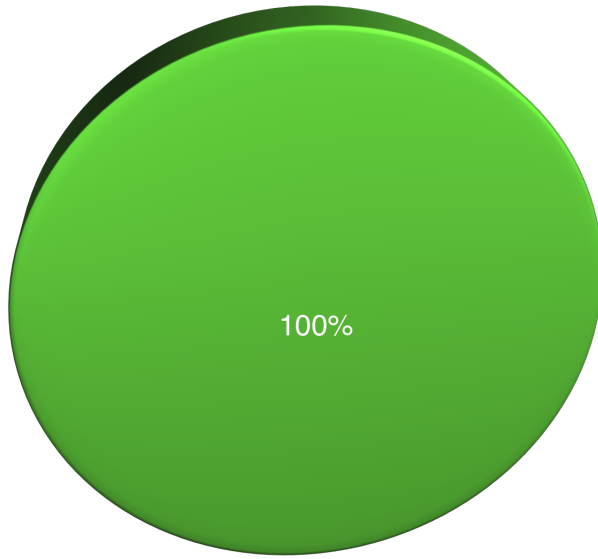

Supplement: gox-7-e2426-s008.pdf [file gox-7-e2426-s008.pdf]

● Yes

● No

● No Answer

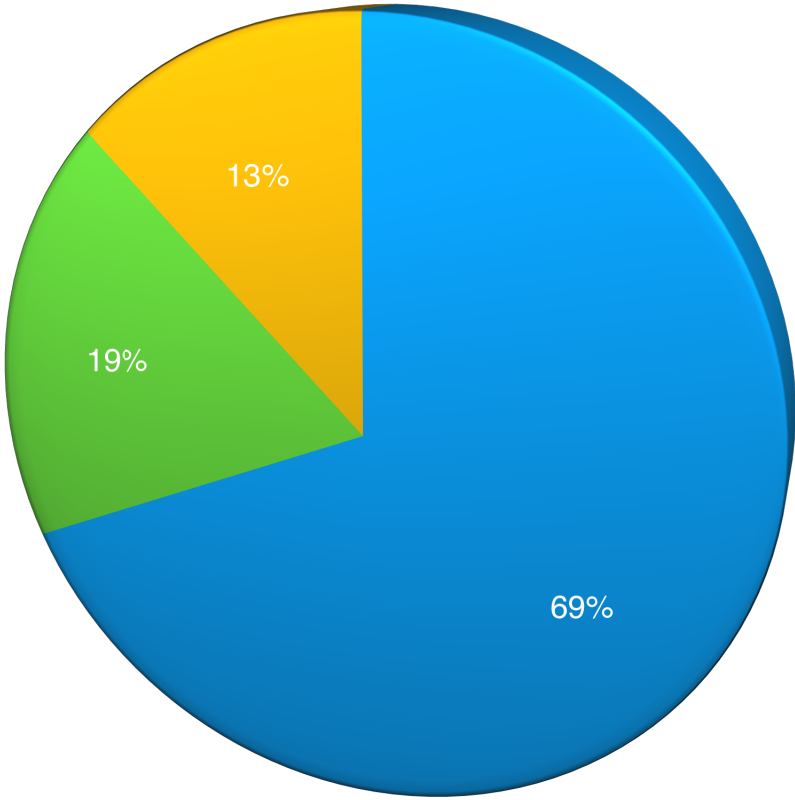

Supplement: gox-7-e2426-s009.pdf [file gox-7-e2426-s009.pdf]

● Yes    ● Yes, only following risk reducing mastectomy    ● No

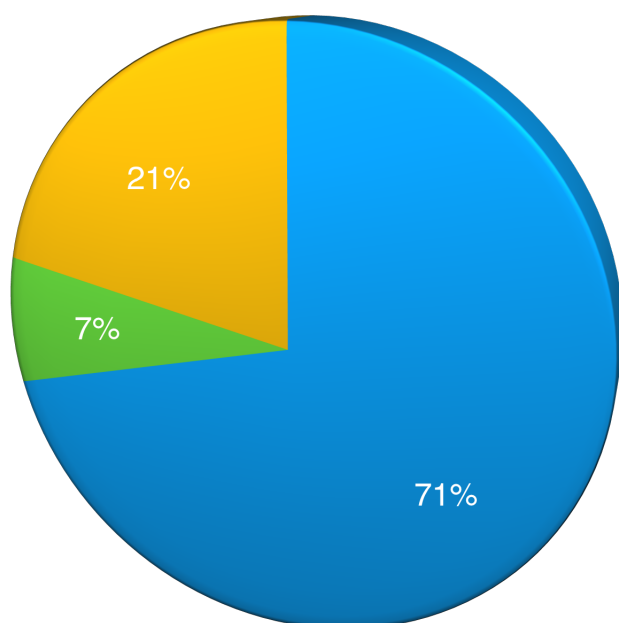

Supplement: gox-7-e2426-s015.pdf [file gox-7-e2426-s015.pdf]

Identification

Screening

Eligibility

Included

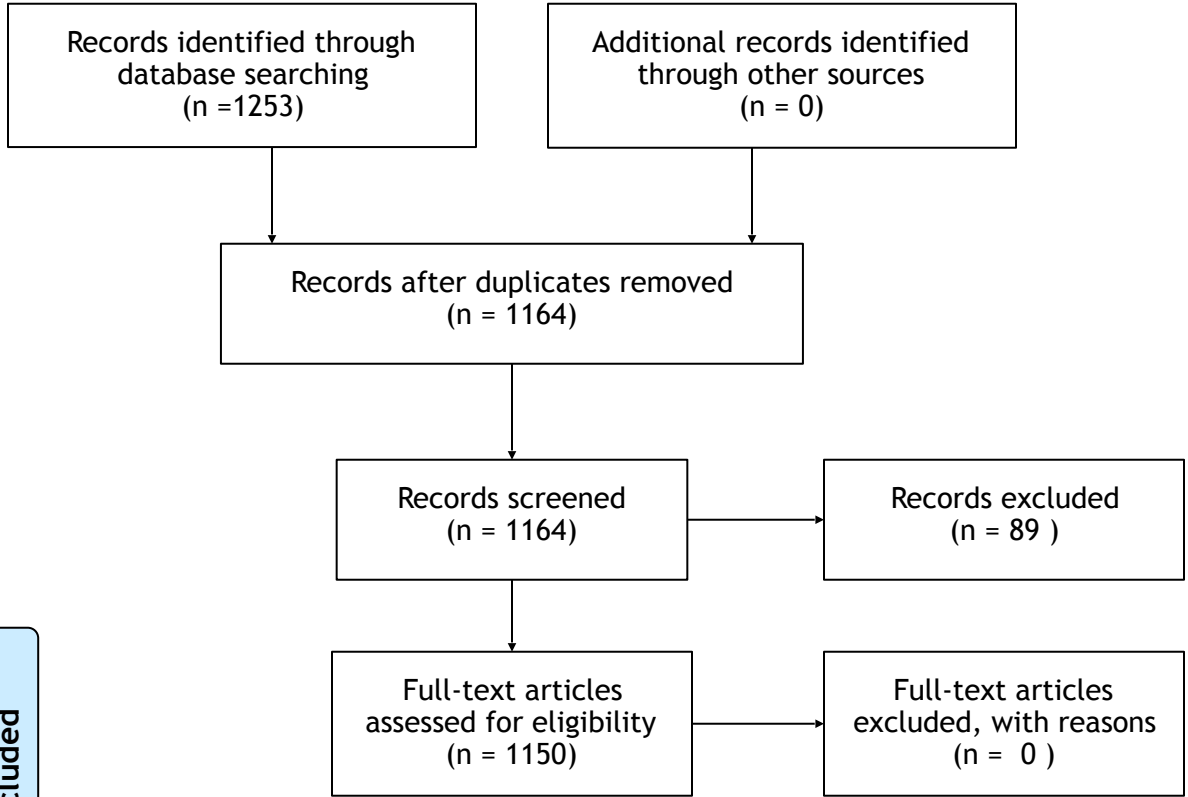

Supplement: gox-7-e2426-s018.pdf [file gox-7-e2426-s018.pdf]
